1 **Title**

2 The many layers of BOLD. On the contribution of different vascular compartments to laminar  
3 fMRI.

4 **Authors**

5 Wouter Schellekens<sup>1</sup>, Alex A. Bhogal<sup>1</sup>, Emiel C.A. Roefs<sup>1</sup>, Mario G. Báez-Yáñez<sup>1</sup>, Jeroen  
6 C.W. Siero<sup>1</sup>, Natalia Petridou<sup>1</sup>

7 **Affiliations**

8 1: Radiology department, Center for Image Sciences, UMC Utrecht, Netherlands

9 **Corresponding author**

10 Name: Wouter Schellekens

11 Email: [W.Schellekens@umcutrecht.nl](mailto:W.Schellekens@umcutrecht.nl)

12 Phone: +31 88 755 1353

13 Postal address: Q101.132, P.O.Box 85500, 3508 GA, Utrecht, Netherlands

14

15 **ABSTRACT**

16 Ultra-high field functional Magnetic Resonance Imaging (fMRI) offers the spatial resolution to  
17 measure neural activity at the scale of cortical layers. Most fMRI studies make use of the  
18 Blood-Oxygen-Level Dependent (BOLD) signal, arising from a complex interaction of  
19 changes in cerebral blood flow (CBF) and volume (CBV), and venous oxygenation. However,  
20 along with cyto- and myeloarchitectural changes across cortical depth, laminar fMRI is  
21 confronted with additional confounds related to vascularization differences that exist across  
22 cortical depth. In the current study, we quantify how the non-uniform distribution of macro-  
23 and micro-vascular compartments, as measured with Gradient-Echo (GE) and Spin-Echo  
24 (SE) scan sequences, respectively, affect laminar BOLD fMRI responses following evoked  
25 hypercapnic and hyperoxic breathing conditions. We find that both macro- and micro-  
26 vascular compartments are capable of comparable theoretical maximum signal intensities, as  
27 represented by the M-scaling parameter. However, the capacity for vessel dilation, as  
28 reflected by the cerebrovascular reactivity (CVR), is approximately three times larger for the  
29 macro- compared to the micro-vasculature at superficial layers. Finally, there is roughly a  
30 35% difference in CBV estimates between the macro- and micro-vascular compartments,  
31 although this relative difference is approximately uniform across cortical depth.

32 **KEYWORDS**

33 Laminar fMRI, vasculature, hypercapnia, hyperoxia, CVR, CBV, BOLD, Spin-echo

34

## 35 INTRODUCTION

36 The cortex of the human cerebrum is made up of different layers. The cortical layers can be  
37 distinguished on the basis of different neuronal cell types, as well as their connections with  
38 other cortical areas or sensory organs<sup>1</sup>. As such, the different cortical layers are  
39 hypothesized to account for different sub-processes in brain functioning and human behavior  
40 at large<sup>2</sup>. Functional Magnetic Resonance Imaging (fMRI) is one of the most powerful tools  
41 for studying brain function in both healthy and diseased individuals non-invasively. Recent  
42 advances in ultra-high field MRI (i.e., magnetic field strength  $\geq 7$  Tesla) now allow for the  
43 recording of layer-specific neuronal activity in human populations. The majority of fMRI  
44 studies use the Blood-Oxygen-Level Dependent (BOLD) signal to investigate neuronal  
45 functions<sup>3</sup>. However, the BOLD signal is an indirect measure of neuronal activity, as it  
46 primarily signals differences in the ratio of venous oxy-hemoglobin [Hb] / deoxy-hemoglobin  
47 [dHb], affecting T2 and T2\* MR-effects. The change in [Hb]/[dHb] ratio following neuronal  
48 activity is mainly caused by increases in cerebral blood flow (CBF) and cerebral blood  
49 volume (CBV), and the subsequent vessel dilation, in the capillary bed, venules, and larger  
50 veins in response to the cerebral metabolic rate of oxygen (CMRO<sub>2</sub>)<sup>4,5</sup>. Despite the indirect  
51 representation of neuronal activity, fMRI BOLD is known to correspond well with neuronal  
52 electrophysiological recordings (Local Field Potentials (LFP) in particular) in both animals  
53 and humans<sup>6,7</sup>. Thus, the differences in CBF/CBV that exist for differently sized venous  
54 vascular compartments (i.e., capillaries, venules and veins) do not prevent the utilization of  
55 the BOLD signal as an adequate proxy for neuronal activation in conventional fMRI studies.  
56 However, laminar fMRI measurements are affected by the vasculature on a whole new level.  
57 Because the vascular architecture changes across cortical depth, a confounding correlation  
58 arises between different vascular compartments and the different cortical layers<sup>8,9</sup>. This is  
59 particularly problematic for the fMRI BOLD scan acquisition sequence that is most commonly  
60 used due to its superior sensitivity: Gradient-Echo (GE) BOLD. GE BOLD is sensitive to all  
61 venous vascular compartments, but the signal scales with vessel diameter<sup>10,11</sup>. GE BOLD,  
62 therefore, is disproportionally sensitive to larger (draining) veins, which predominantly reside  
63 near the cortical pial surface. This relative hypersensitivity to the macro-vasculature leads to  
64 a relative increase in raw BOLD signals measured at superficial layers, while simultaneously  
65 suffering from a decrease in neuronal specificity, as the largest veins pool blood from  
66 extended regions of cortex. Therefore, even the scaling of the raw BOLD signal to e.g.,  
67 percent signal change, cannot prevent or neutralize the fact that neuronal populations of  
68 different sizes, represented through different vascular compartments, contribute to the BOLD  
69 signal differently across cortical depth<sup>12</sup>. The field of laminar fMRI is currently lacking an  
70 adequate quantification of the effect of different vascular compartments on the BOLD signal

71 at the laminar level. Here, we address this topic by conducting a series of measurements in  
72 which we record from micro- and macro-vascular compartments across cortical depth, while  
73 applying respiratory stimuli to characterize the confounding correlation between differently  
74 sized vascular compartments and the BOLD signal.

75 To characterize the influence of different vascular compartments on the fMRI BOLD  
76 signal we capitalize on the increased BOLD Contrast-to-Noise Ratio (CNR) afforded by a 7  
77 Tesla MR system along with boosted sensitivity obtained using a high-density surface  
78 receive array<sup>13</sup> to acquire high spatiotemporal resolution images capable of distinguishing  
79 cortical layers. Using a computer-controlled gas delivery system, we manipulate CBF/CBV by  
80 increasing the arterial pressure of CO<sub>2</sub>, a potent vasodilator, in a controlled manner<sup>14–16</sup>. The  
81 increased CBF/CBV decreases the relative venous deoxy-hemoglobin content, which leads  
82 to a BOLD signal increase. To modulate oxygen saturation in the absence of vascular  
83 responses, we also apply a hyperoxic stimulus. Increasing the inhaled concentration of O<sub>2</sub>  
84 causes a relative increase in the venous concentration of oxy-hemoglobin, which  
85 subsequently results in a BOLD signal increase. Beside the estimation of the BOLD signal  
86 change as a result of vasoactive stimulation, the hypercapnia and hyperoxia breathing  
87 challenges can be wielded to estimate changes in cerebral vascular reactivity (CVR), which  
88 represents the capacity for vessel dilation<sup>17–19</sup>, the M-scaling parameter reflective of the  
89 theoretical maximal signal change<sup>20,21</sup>, as well as the change in CBV during separate levels  
90 of hypercapnia<sup>15,22</sup>. With these parameters we can quantify to what extent the amplitude of  
91 the BOLD response is caused by a vessel's capacity for dilation (CVR), the maximum  
92 venous oxygen content (M-scaling), or the relative CBV increase.

93 In the current study, we investigate the effect of vasoactive stimuli on laminar fMRI  
94 BOLD signals originating from different vascular compartments across cortical depth. Where  
95 the GE BOLD signal is weighted towards the macro-vasculature, the Spin-Echo (SE) BOLD  
96 signal is generally believed to reflect the micro-vasculature (i.e., mostly capillaries) at high  
97 field strengths<sup>23–25</sup>. Unlike the macro-vasculature, the micro-vasculature is uniformly  
98 distributed across cortical depth, and is not believed to be capable of vessel dilation in a  
99 similar fashion as larger veins<sup>8,9,26</sup>. We utilize GE and SE scan sequences at approximately  
100 laminar spatial resolution as measures of macro- and micro-vascular compartments,  
101 respectively. Hypercapnia and hyperoxia conditions are realized during scanning to  
102 characterize the effects of vasoactive stimuli on different vascular compartments. We expect  
103 a percent signal BOLD increase (i.e., %ΔBOLD) for all vascular compartments (i.e., GE &  
104 SE), during both hypercapnic and hyperoxic breathing conditions (i.e., increased levels of  
105 CO<sub>2</sub> and O<sub>2</sub>) across cortical depth. However, the %ΔBOLD as well as CVR, M-scaling, and

106  $\Delta$ CBV sampled from the macro-vasculature are hypothesized to increase from deep to  
107 superficial layer estimates, but not for the micro-vasculature. Finally, macro-/micro-  
108 vasculature ratios for CVR, M-scaling, and  $\Delta$ CBV are calculated, describing the effective  
109 relative contribution of the vascular compartments to laminar BOLD fMRI.

110

## 111 **METHODS**

### 112 **Participants**

113 Eleven healthy volunteers (N = 11, age range 18-42y, mean age = 24.3y, Female = 8)  
114 participated in this study after giving written informed consent. All participants declared that  
115 they did not experience breathing difficulties under normal conditions, and had not been  
116 diagnosed with (cerebro)vascular-related illnesses. The experimental protocol was approved  
117 by the local ethics committee of the University Medical Center Utrecht (UMCU) in  
118 accordance with the Declaration of Helsinki (2013), and the Dutch Medical Research  
119 Involving Human Subjects Act.

### 120 **Breathing protocol**

121 During the acquisition of the functional BOLD time-series (see details below), we  
122 administered specific breathable gas mixtures to the participants. Hypercapnia and hyperoxia  
123 conditions were achieved by increasing the CO<sub>2</sub> and O<sub>2</sub> gas concentrations, respectively.  
124 Postapneic End-tidal (Pet)CO<sub>2</sub> and PetO<sub>2</sub> pressure values were targeted using a computer-  
125 controlled gas blender and sequential gas delivery system. (3<sup>rd</sup> generation RespirAct™,  
126 Thornhill Research Inc, Toronto, Canada). A 697s breathing task was performed consisting  
127 of the following 4 parts: (1) 200s baseline period with subject-specific targeted PetCO<sub>2</sub>  
128 values. (2) 120s hypercapnia period of +3 or +5 mmHg PetCO<sub>2</sub> increase. (3) 120s  
129 hypercapnia period of +8 or +10 mmHg PetCO<sub>2</sub> increase. (4) 120s hyperoxia period of +350  
130 mmHg PetO<sub>2</sub> increase (Figure 1). The breathing task was performed twice by all participants:  
131 once for each scan acquisition sequence (i.e., GE & SE), during which the hypercapnia  
132 conditions consisted of a +5 mmHg PetCO<sub>2</sub> increase followed by a +10 mmHG PetCO<sub>2</sub>  
133 increase. The experiment was repeated in 7 participants with +3 mmHg PetCO<sub>2</sub> and +8  
134 mmHg PetCO<sub>2</sub> hypercapnia conditions both for GE and SE scan acquisitions. The subject-  
135 specific baseline PetCO<sub>2</sub> calibration was estimated before scanning.

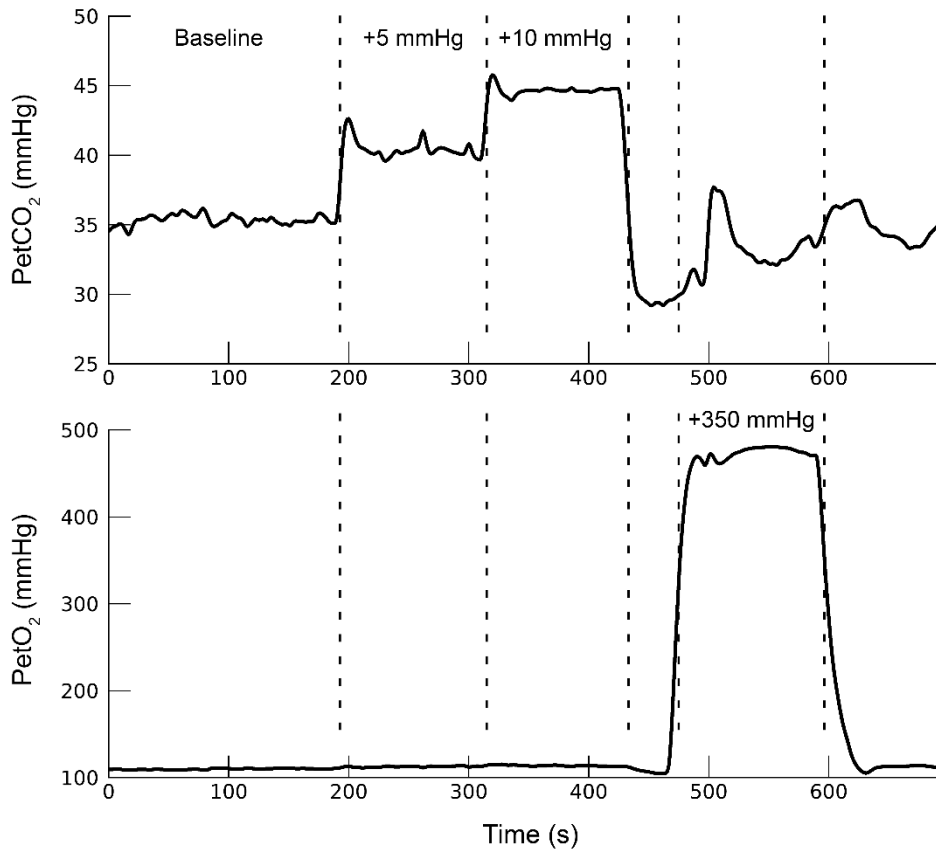

136

137 **Figure 1. Breathing protocol.** For 1 participant (subj08) the hypercapnic (top panel) and hyperoxic (bottom  
138 panel) breathing conditions are shown. The dashed lines mark the different parts of the breathing protocol.

### 139 Scan protocol

140 Scanning was performed at the UMCU on a 7T Philips Achieva scanner (Philips Healthcare,  
141 Best, the Netherlands) with two 16-channel high-density surface receive arrays (MRCoils BV,  
142 the Netherlands). The anatomical scans consisted of a T1-weighted structural volume: Field  
143 Of View (FOV) (ap x fh x rl) = 40 x 159 x 159 mm, which covered the posterior part of the  
144 brain (occipital lobe/early visual cortex). The acquired voxel size was: 0.8 x 0.8 x 0.8 mm  
145 isotropic, TR/TE = 7.0/2.97ms. T1-weighted volumes at high field strength can experience  
146 substantial intensity inhomogeneities. Therefore, a proton density (PD) volume of equal  
147 dimension was recorded to correct for these large-scale intensity inhomogeneities. Finally,  
148 three T2\*-weighted flow-compensated anatomical volumes were acquired with similar  
149 coverage: FOV (ap x fh x rl) 40 x 161 x 161 mm and 0.5 x 0.5 x 0.5 mm voxel size, TR/TE =  
150 56/30ms. Both magnitude and phase volumes were reconstructed.

151

152 Functional volumes were acquired with two different scan sequences; GE and SE  
153 sequences, both using Echo Planar Imaging (EPI). The GE volumes were acquired with  
154 SENSE-factor = 3.0, EPI-factor = 31, TR/TE = 850/27ms, flip-angle (FA) = 50°, voxel size =  
155 1.0 x 1.0 x 1.0 mm, FOV = 7 x 128 x 128 mm covering a portion of early visual cortex within  
156 the occipital lobe. To increase the Signal-to-Noise Ratio (SNR), the SE volumes were  
157 required at a lower spatial resolution: SENSE-factor = 2.0, EPI-factor = 63, TR/TE =  
158 850/50ms, FA = 90°, voxel size = 1.5 x 1.5 x 1.5 mm, FOV = 7.5 x 190 x 190 mm. During a  
159 single MRI-session, a maximum of four fMRI time series (i.e., 2 x GE and 2x SE) were  
160 recorded, during which the different breathing protocols were applied. Each time series  
161 consisted of 820 volumes (duration = 697s per time series). For both GE and SE sequences  
162 5 volumes with reversed phase encoding (i.e., right-left) were recorded to correct for  
163 geometric distortions. During all acquisitions, respiration was measured with a respiratory  
164 belt around the chest, and blood pulsation with a peripheral pulse unit (PPU). The respiration  
165 and PPU measurements were used to calculate the Respiration Volume per Time (RVT) and  
166 beats per minute (BPM)<sup>27</sup>.

## 167 **Preprocessing**

168 The T1-weighted volume was divided by the PD volume to correct for large-scale intensity  
169 inhomogeneities<sup>28</sup>. Afterwards, the T1 weighted volume was resampled to a resolution of 0.2  
170 mm<sup>3</sup> isotropic voxel size to estimate cortical layers at high spatial resolution (Figure 2). The  
171 cortex was divided into 20 equivolumetric laminae using the LayNii software package<sup>29</sup>. Here,  
172 the word 'laminae' is used rather than 'layers' to emphasize that these laminae do not  
173 represent architectonic layers distinguishable with histology, but reflect a measure of cortical  
174 depth.

175 The three T2\*-weighted volumes were first realigned and averaged to increase signal-  
176 to-noise. The mean T2\*-weighted volume was used to segment large veins, which have a  
177 near-zero intensity due to the low T2 of blood and, therefore, appear black within the volume  
178 (Figure 2A). The vein segmentation was performed twice with different software packages  
179 that produced complementary results. First, large veins were estimated on the magnitude  
180 volume with Braincharter<sup>30</sup>. Second, large veins were estimated again with Nighres<sup>31</sup> on a  
181 quantitative susceptibility map (QSM). The QSM was reconstructed by Laplacian-based  
182 unwrapping and SHARP background filtering of the phase volume<sup>32,33</sup>, and subsequently an  
183 iterative rapid two-step dipole inversion method<sup>34</sup>. Both methods were combined to obtain the  
184 pial vein estimation volume (Figure 2C).



185 A Region-of-Interest (ROI) approach was adopted, consisting of the primary visual  
186 cortex (V1) and extra-striate areas V2 and V3, as these areas are believed to have a  
187 comparable vascularization<sup>35</sup>. Estimates of early visual cortical areas V1, V2, and V3 were  
188 constructed using a whole-brain 3 Tesla T1-weighted volume that was available for the  
189 participants. A white and grey matter cortical surface was estimated on the 3T T1-weighted  
190 volume with Freesurfer (<https://surfer.nmr.mgh.harvard.edu>). The cortical surface  
191 reconstructions were then used to generate a surface-based visual area maps using the  
192 anatomically defined Benson atlas of visual areas with Neuropythy  
193 (<https://github.com/noahbenson/neuropythy>)<sup>36</sup>. The visual area maps were projected back to  
194 volumetric space, and through a co-registration of 3T and 7T T1-weighted volumes,  
195 transformed to 7T T1-weighted space (Figure 2D).

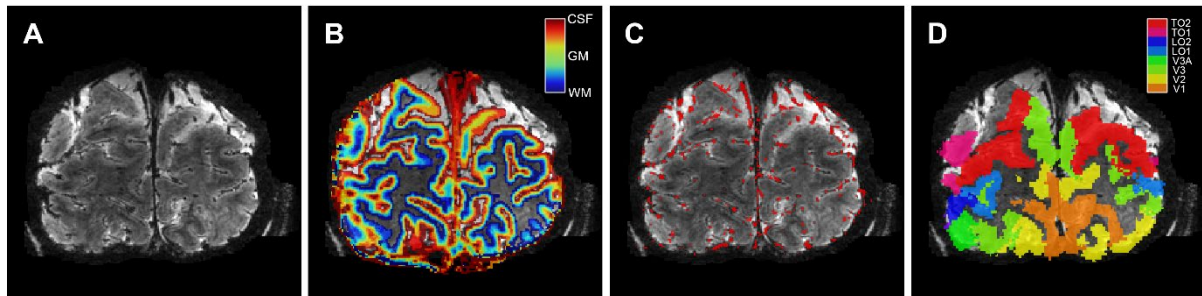

196

197 **Figure 2. Volumetric maps.** For 1 participant (subj09) the T2\*-weighted anatomical volume (A), the layer  
198 segmentation (B), the pial vein estimation (C), and the visual ROIs (D) are shown. Of the visual ROIs, only V1,  
199 V2, and V3 were included.

200 All functional volumes were corrected for rigid body head motion with AFNI's  
201 3dvolreg. The EPI phase-encoding induced geometric distortions were corrected using  
202 AFNI's 3dQwarp. This EPI distortion correction and the motion correction were  
203 simultaneously applied in a single interpolation step using 3dNwarpApply to generate motion-  
204 corrected undistorted functional time series<sup>37,38</sup>. An affine registration was then performed  
205 between the mean volume of the functional time-series and the T1 anatomical volume using  
206 antsRegistration (<http://stnava.github.io/ANTs/>)<sup>39</sup>. The inverse of this transformation matrix  
207 was used to transform the previously acquired laminae volume, pial vein volume, and early  
208 visual cortex volume to the origin and dimensions of the functional volumes using a nearest  
209 neighbor interpolation. Lastly, we spatially smoothed the data per cortical depth level (i.e.  
210 deep, middle, and superficial levels) and visual area using a Gaussian kernel with a standard  
211 deviation of 1mm. This procedure prevents the blurring of voxel data between different  
212 cortical depth levels or visual areas. The functional time series were then high-pass filtered  
213 using a discrete cosine transform filtering with a cut-off at 0.01 Hz and re-scaled to percent  
214 signal change.

## 215 **FMRI data analysis**

216 Estimates of the change in percent BOLD signal for each of the hypercapnia and hyperoxia  
217 levels were calculated using a General Linear Model (GLM). The GLM regressors consisted  
218 of a binary time series for each available breathing condition, and a set of nuisance  
219 regressors consisting of 6 rigid-body head motion parameters and the RVT and BPM. We  
220 use binary regressors for the breathing conditions (i.e., value of 1 during the respective  
221 condition, 0 otherwise) in order to split up the connected hypercapnia conditions, and obtain  
222 regression coefficients for both. A second benefit of the binary gas condition regressors is  
223 that they are not affected by transient signal changes (e.g. caused by movements), but rather  
224 fit the average plateau of the 2 minute hypercapnia and hyperoxia conditions. The regression  
225 coefficients per breathing condition serve as % $\Delta$ BOLD for each voxel. The % $\Delta$ BOLD values  
226 for the hypercapnia conditions (i.e., % $\Delta$ BOLD<sub>hc</sub>) were then used to calculate the Cerebral  
227 Vascular Reactivity (CVR). For each voxel within participants, a linear regression between  
228 the obtained PetCO<sub>2</sub> increase (i.e.,  $\Delta$ PetCO<sub>2</sub>) and % $\Delta$ BOLD<sub>hc</sub> was performed. The slope of  
229 the linear regression within each voxel represents the CVR for that voxel.

230 To estimate the relative change in CBV, we first used the % $\Delta$ BOLD values from the  
231 hyperoxia condition (% $\Delta$ BOLD<sub>ho</sub>) to estimate the M-scaling factor using the hyperoxia-  
232 calibrated BOLD model (including the usage of literature standard values) from Chiarelli et  
233 al.<sup>40</sup>:

$$234 \frac{\Delta BOLD}{BOLD_0} = M \cdot \left( 1 - \left( \frac{CBV}{CBV_0} \right) \left( \left( \frac{[dHb]_v}{[dHb]_{v0}} \right)^\beta \right) \right) \quad (1)$$

235 Where M is a scaling parameter that represents the theoretical maximum signal change. The  
236 subscript “0” refers to baseline conditions and the subscript “v” refers to venous properties.  
237 The change in CBV relates to the change in CBF following the venous coupling exponent  $\alpha =$   
238 0.2<sup>41</sup>:

$$239 \left( \frac{CBV}{CBV_0} \right) = \left( \frac{CBF}{CBF_0} \right)^\alpha \quad (2)$$

240 Because hyperoxia is generally believed to have a negligible effect on the change in CBF,  
241 equation (1) under hyperoxia conditions can be simplified to:

$$242 \frac{\Delta BOLD}{BOLD_0} = M \cdot \left( 1 - \left( \frac{[dHb]_v}{[dHb]_{v0}} \right)^\beta \right) \quad (3)$$

243 This means that the change in BOLD signal under hyperoxia conditions is caused by the  
244 change in venous de-oxyhemoglobin concentration. The change in  $[dHb]_v$  can be estimated  
245 through standard formulas of oxygen transportation in the blood and by assuming a baseline  
246 oxygen extraction fraction (OEF). The end-tidal oxygen pressure values can be used to infer  
247 the arterial oxygen tension ( $Pa_{O_2}$ ). Then, using the Severinghaus equation we can obtain the  
248 arterial oxygen saturation ( $Sa_{O_2}$ )<sup>42</sup>:

$$249 \quad Sa_{O_2} = \frac{1}{\left( \frac{23400}{(Pa_{O_2})^3 + 150(Pa_{O_2})} + 1 \right)} \quad (4)$$

250 Now, the arterial oxygen content ( $Ca_{O_2}$ ) can be estimated by assuming literature standard  
251 values for: the  $O_2$ -carrying capacity of hemoglobin ( $\varphi$ : 1.34 ml  $O_2$  / g<sub>hb</sub> in humans), the  
252 concentration of hemoglobin ( $[Hb]$ : 15 g Hb / dl blood), and the solubility coefficient of oxygen  
253 in blood ( $\varepsilon$ : 0.0031 ml  $O_2$  / (dl blood \* mmHg):

$$254 \quad Ca_{O_2} = (\varphi \cdot [Hb] \cdot Sa_{O_2}) + (Pa_{O_2} \cdot \varepsilon) \quad (5)$$

255 The venous oxygen content ( $Cv_{O_2}$ ) depends on the  $Ca_{O_2}$  and the OEF. We did not measure  
256 the OEF, but assume a literature standard value of OEF = 0.30<sup>40,43</sup>:

$$257 \quad Cv_{O_2} = Ca_{O_2} - (Ca_{O_2}|_0 \cdot OEF) \quad (6)$$

258 The venous oxygen saturation ( $Sv_{O_2}$ ) can be estimated as follows:

$$259 \quad Sv_{O_2} = \frac{Cv_{O_2} - (Pv_{O_2} \cdot \varepsilon)}{\varphi \cdot [Hb]} \quad (7)$$

260 In equation (7), the  $Pv_{O_2}$  represents the oxygen dissolved in venous plasma and is believed  
261 to have a negligible small effect. At this point we can estimate the deoxygenated fraction of  
262  $[Hb]$  ( $F_{[dHb]}$ ) from  $Sv_{O_2}$ :

$$263 \quad F_{[dHb]} = 1 - Sv_{O_2} \quad (8)$$

264 The relative change in  $F_{[dHb]}$  during hyperoxia conditions represents the  $[dHb]_v/[dHb]_{v0}$  ratio  
265 from equation (3), which means that the M scaling parameter can be estimated as follows:

$$266 \quad M = \frac{\Delta BOLD / BOLD_0}{\left( 1 - \left( F_{[dHb]} / F_{[dHb]_0} \right)^\beta \right)} \quad (9)$$

267 The “ $\beta$ ” represents the influence of deoxygenated hemoglobin on transverse relaxation, and  
268 is estimated at  $\beta \approx 1$  for 7 Tesla MRI<sup>44,45</sup>.

269 Now with the estimated M-parameters from the hyperoxia condition, we can estimate the  
270 change in venous CBV. The Davis model describes the change in [dHb] as equal to CMRO<sub>2</sub>  
271 and CBF<sup>20,21</sup>:

$$272 \frac{[dHb]_v}{[dHb]_{v0}} = \frac{CMRO_2}{CMRO_{2|0}} \cdot \frac{CBF_0}{CBF} \quad (10)$$

273 Using equations (2) and (10), we can transform equation (1) to:

$$274 \frac{\Delta BOLD}{BOLD_0} = M \cdot \left( 1 - \left( \frac{CBV}{CBV_0} \right)^{-\beta/\alpha} \cdot \left( \frac{CMRO_2}{CMRO_{2|0}} \right)^\beta \right) \quad (11)$$

275 Hypercapnia conditions cause a small metabolic decrease, and was previously estimated to  
276 be approximately a 15% decrease for 90% CBF increase (+22 mmHg CO<sub>2</sub>). The effect is  
277 believed to scale linearly with CBF increase (and therefore with CO<sub>2</sub> inspiration), which is  
278 why we adopt the following values for  $\left( \frac{CMRO_2}{CMRO_{2|0}} \right)$  during +3 mmHg, +5 mmHg, +8 mmHg, and  
279 +10 mmHg petCO<sub>2</sub>: [0.97; 0.95; 0.92; 0.90], respectively<sup>46</sup>. Now with the estimated M  
280 parameter from the hyperoxia condition, we can estimate  $\Delta CBV$  as follows:

$$281 \frac{CBV}{CBV_0} = \left( - \left( \frac{\Delta BOLD/BOLD_0}{M} - 1 \right)^{-\beta/\alpha} / \left( \frac{CMRO_2}{CMRO_{2|0}} \right)^{1-\alpha} \right) \quad (12)$$

## 282 **Statistical analysis**

283 A general linear model (GLM) was constructed that consisted of gas challenge regressors  
284 and nuisance regressors (i.e., motion & physiology parameters). Hypercapnia and hyperoxia  
285 condition t-statistics were calculated on the basis of regression coefficients for the individual  
286 gas challenges. Only voxels that responded significantly to the gas-challenges were selected  
287 for further analyses ( $p < 0.05$ , Holm-Bonferroni corrected). Additional masks were imposed  
288 by the ‘laminae mask’ and ‘visual area mask’, which meant that only voxels were selected  
289 that were in range of grey matter cortical layers within visual areas V1, V2, and V3.

290 Separate linear mixed models (LMM) were constructed with “% $\Delta BOLD_{hc}$ ”,  
291 “% $\Delta BOLD_{ho}$ ”, “CVR”, “M”, “ $\Delta CBV$ ” as dependent variables, and with the participants as a  
292 random-effects grouping factor. The usage of an LMM analysis allows for the inclusion of  
293 each voxel as a separate observation for each of the metrics. Additionally, the model is

294 capable of handling missing values for +3 mmHg and +8 mmHg PetCO<sub>2</sub> hypercapnia levels  
295 in 4 participants, which means that all conditions and measurements of all participants could  
296 be included. Each LMM had the following ‘fixed effects’ variables: scan sequence (i.e., GE,  
297 SE); and cortical depth (i.e., scaled laminae estimate). The LMM for % $\Delta$ BOLD<sub>hc</sub> and  $\Delta$ CBV,  
298 additionally, have a PetCO<sub>2</sub> fixed effect variable (i.e., scaled variable of measured PetCO<sub>2</sub>).  
299 Random slopes were estimated across the participant random effect. The LMMs were fitted  
300 using the restricted maximum likelihood (REML) approach, and the degrees of freedom were  
301 calculated using the Satterthwaite model. The statistical test were performed using *JASP*  
302 (V.0.15, [www.jasp-stats.org](http://www.jasp-stats.org)).

303 **Results**

304 *Percent signal change*

305 We observed an average increase in percent signal change following the hypercapnia  
306 conditions ( $F_{(1,9,9)} = 54.17$ ,  $p < .001$ ). The  $\% \Delta \text{BOLD}_{\text{hc}}$  differed significantly per scan sequence  
307 ( $F_{(1,9,9)} = 5.40$ ,  $p = .043$ . Figure 3), meaning that the micro- and macro-vasculature on  
308 average produced significantly different BOLD signal amplitudes (mean  $\% \Delta \text{BOLD}_{\text{hc}}$  GE =  
309 3.85, 95% CI = [3.58, 4.12]; mean  $\% \Delta \text{BOLD}_{\text{hc}}$  SE = 2.62, 95% CI = [2.39, 2.84]). While taking  
310 both GE and SE into account, there was no effect of cortical depth on  $\% \Delta \text{BOLD}_{\text{hc}}$  ( $F_{(1,9,3)} =$   
311 1.27,  $p = .288$ ). However, there was a strong interaction effect of the signal amplitude during  
312 hypercapnia levels with the laminae estimates ( $F_{(1,10,0)} = 29.06$ ,  $p < .001$ ), and the additional  
313 three-way interaction with scan sequence ( $F_{(1,10,4)} = 20.32$ ,  $p = .001$ ). These results indicate  
314 that  $\% \Delta \text{BOLD}_{\text{hc}}$  increases more strongly with increased  $\text{CO}_2$  inspiration at superficial layers  
315 than deeper layers. This effect was more prominent for the GE scan sequence as opposed to  
316 the SE scan sequence (Figure 4).

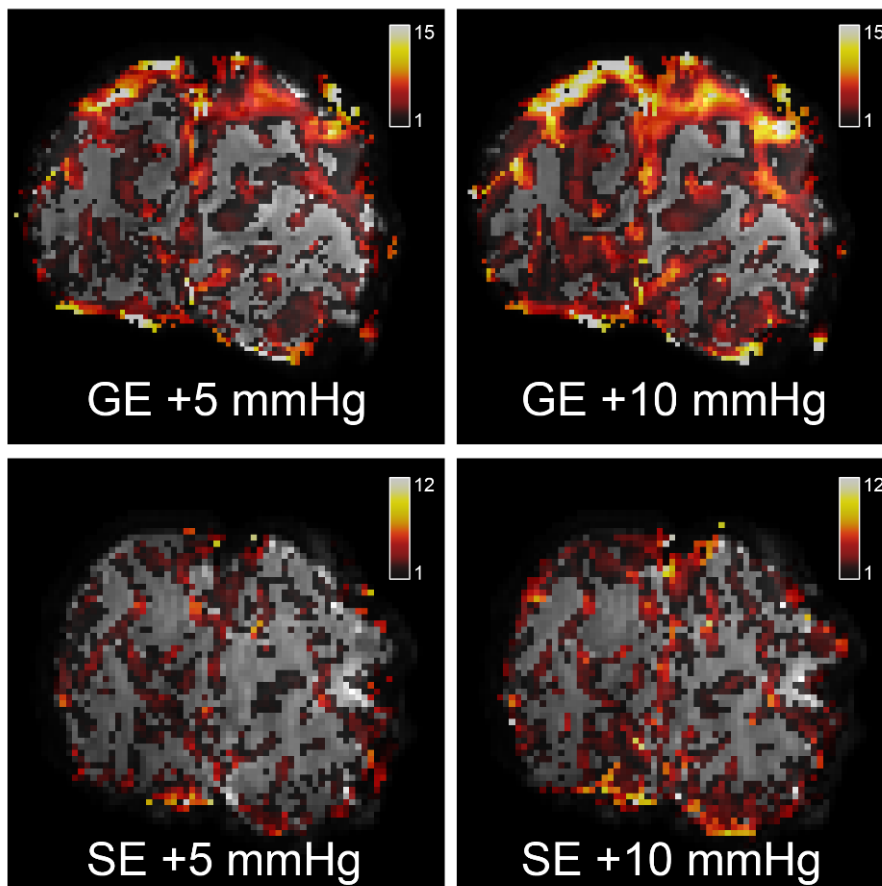

**Figure 3. Volumetric hypercapnia BOLD effect.** The  $\% \Delta \text{BOLD}_{\text{hc}}$  is shown for one participant (subj02) for 2 hypercapnia levels: +5 mmHg & +10 mmHg  $\text{PetCO}_2$  (left-right panels), as measured with GE (top panels) and SE (bottom panels).

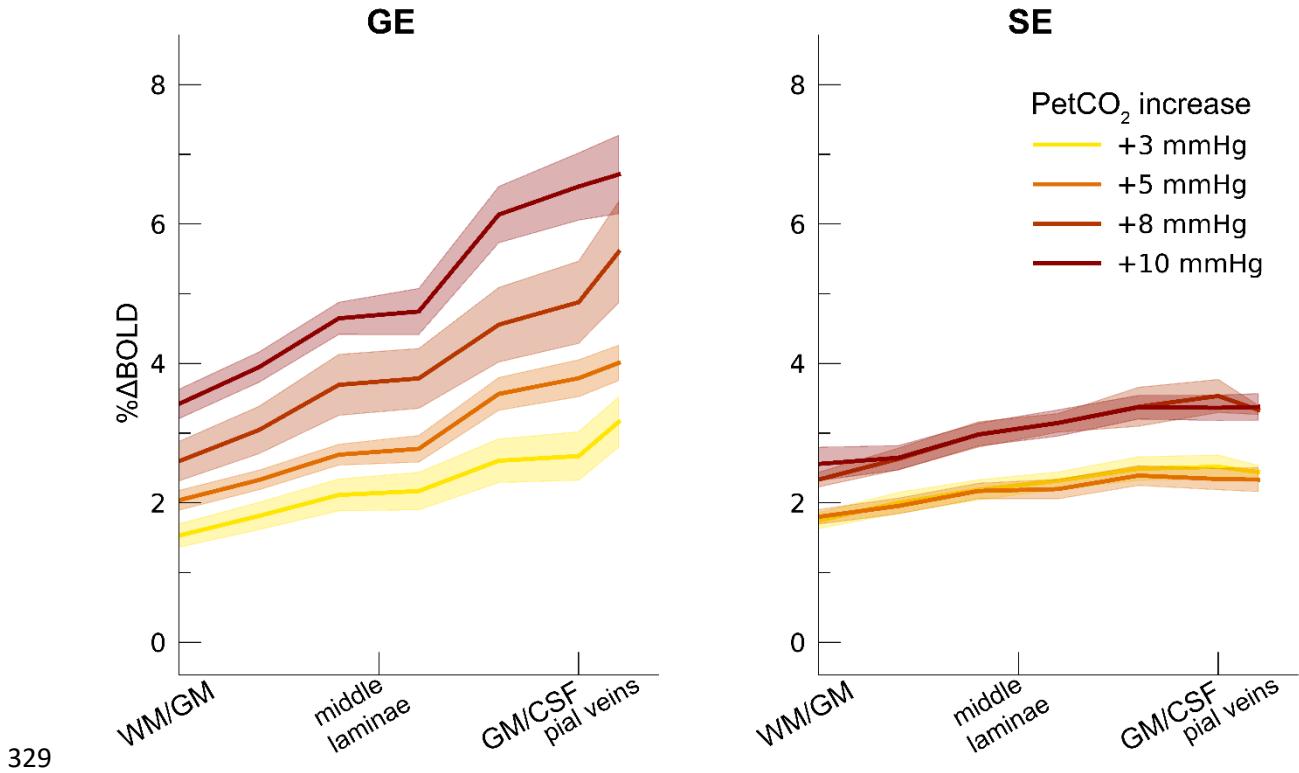

330 **Figure 4. Percent BOLD signal change hypercapnia.** The  $\% \Delta BOLD_{hc}$  is shown across cortical depth for the 4  
331 hypercapnia levels (colors) and 2 scan sequences (left/right panels). The shaded area represents the SEM across  
332 participants.

333 The hyperoxia condition also influenced the BOLD signal amplitude  $\% \Delta BOLD_{ho}$  ( $t_{(7.7)}$   
334 = 8.97,  $p < .001$ ; mean  $\% \Delta BOLD_{ho}$  GE = 2.48, 95% CI = [1.89, 3.07]; mean  $\% \Delta BOLD_{ho}$  SE =  
335 2.28, 95% CI = [1.92, 2.64]). In contrast to the hypercapnia conditions, the  $\% \Delta BOLD_{ho}$   
336 increased from deeper to superficial laminae during both GE and SE scan sequences ( $F_{(1,9.7)}$   
337 = 68.72,  $p < .001$ ), without there being a difference observed between scan sequences  
338 ( $F_{(1,9.6)} = 3.90$ ,  $p = .078$ ), nor an interaction of scan sequence and laminae ( $F_{(1,9.2)} = 5.01$ ,  $p =$   
339 .052). These results signify that both the micro- and macro-vasculature are highly sensitive to  
340 the relative increase in venous oxyhemoglobin, having the largest effect near the pial surface  
341 (Figure 5).

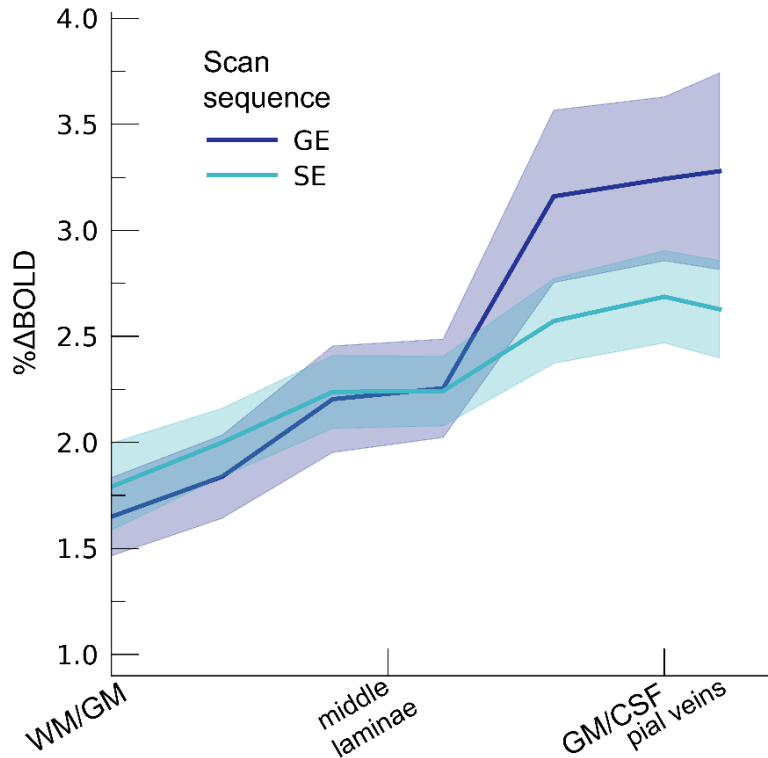

**Figure 5. Percent BOLD signal change hyperoxia.** The % $\Delta$ BOLD<sub>ho</sub> is shown across cortical depth for the 2 scan sequences (colors). The shaded area represents the SEM across participants.

354

355 CVR

356 The laminae estimates had a significant effect on CVR. Generally, CVR increased towards  
357 the superficial layers ( $F_{(1,10.0)} = 34.16$ ,  $p < .001$ ). The increase in CVR towards the superficial  
358 layers was particularly apparent for the GE scan sequence, as shown by the significant  
359 interaction effect between scan sequence and cortical depth factors ( $F_{(1,10.0)} = 17.02$   $p =$   
360  $.002$ ). In contrast, the SE sequence did not show a strong increase in CVR from deeper to  
361 superficial layers (Figure 6). The deeper cortical layers showed on average a CVR estimate  
362 of CVR = 0.39 for GE (95% CI = [0.28, 0.50]) and CVR = 0.18 for SE (95% CI = [0.13, 0.23]),  
363 whereas the superficial cortical layers exhibited CVR estimates of CVR = 0.64 for GE (95%  
364 CI = [0.50, 0.79]) and CVR = 0.25 for SE (95% CI = [0.20, 0.31]). Thus, the increase in CVR  
365 across cortical depth is over a factor of 3 larger for the macro-vasculature than the micro-  
366 vasculature.

367

368

369



## 370 M-scaling

371 We estimated the M-value based on the  $\% \Delta \text{BOLD}_{\text{ho}}$  and the  $\text{PetO}_2$  trace during hyperoxia  
372 (Figure 7). The M-scaling parameter increased strongly across cortical depth, peaking near  
373 the GM/CSF border ( $F_{(1,10.0)} = 75.79$ ,  $p < .001$ ). However, a difference between scan  
374 sequences was not observed ( $F_{(1,9.9)} = 0.54$ ,  $p = .479$ ). M-scaling parameter estimates reveal  
375 a substantial maximum signal change capacity for both scan sequences (mean M-scaling GE  
376 = 14.28, 95% CI = [11.87, 16.69]; mean M-scaling SE = 12.26, 95% CI = [10.58, 13.94]). We,  
377 additionally, observed an interaction effect of scan sequence and cortical depth ( $F_{(1,9.8)} =$   
378 9.88,  $p = .011$ ). This interaction effect reflects the fact that no difference in M-scaling at  
379 deeper cortical laminae between GE and SE sequences was observed (mean M-scaling  
380 deeper laminae GE = 10.74, 95% CI = [8.84, 12.65]; SE = 10.38, 95% CI = [8.64, 12.62];  
381 post-hoc  $z = 0.45$ ,  $p = .653$ ), while M-scaling was significantly larger at superficial laminae for  
382 GE compared to SE (mean M-scaling deeper laminae GE = 17.81, 95% CI = [14.73, 20.88];  
383 SE = 14.14, 95% CI = [12.22, 16.05]; post-hoc  $z = 2.97$ ,  $p = .009$ ).

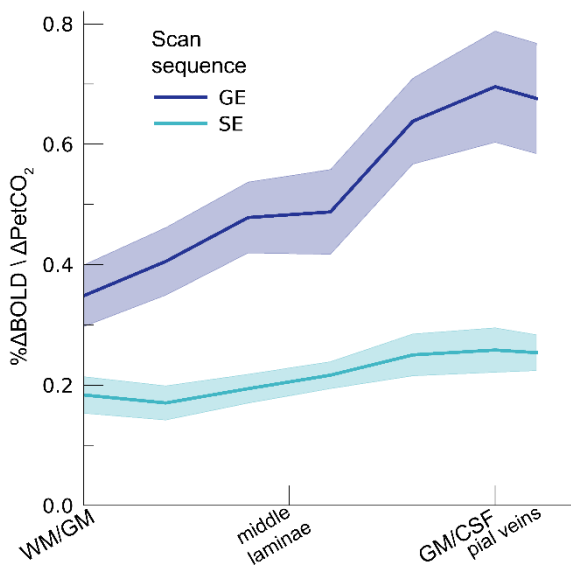

**Figure 6. CVR.** The CVR is shown across cortical depth for the 2 scan sequences (colors). The shaded area represents the SEM across participants.

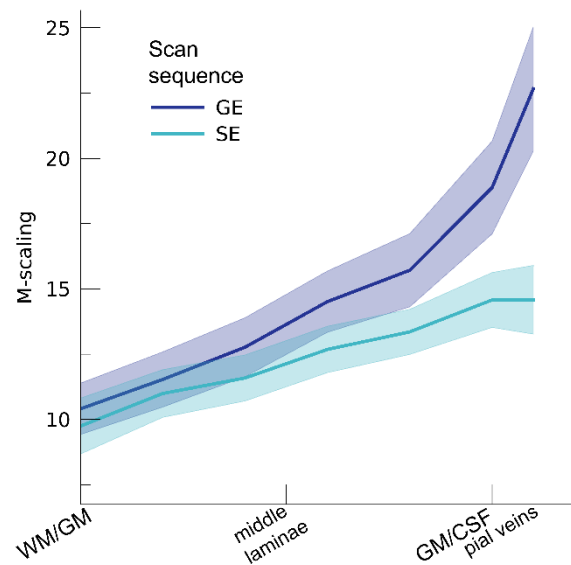

**Figure 7. M-scaling.** The theoretical maximum signal intensity “M” is shown across cortical depth for the 2 scan sequences (colors). The shaded area represents the SEM across participants.

## 384 $\Delta \text{CBV}$

385 Our  $\Delta \text{CBV}$  estimate shows a significant effect of different hypercapnia levels ( $F_{(1,10.2)} = 28.63$ ,  
386  $p < .001$ ), which is representative of an increase in  $\Delta \text{CBV}$  with increased levels of inspired  
387  $\text{CO}_2$  (Figure 8). We, additionally, observed an interaction effect of hypercapnia levels with the  
388 scan sequence ( $F_{(1,9.3)} = 8.61$ ,  $p = .016$ ) as the  $\Delta \text{CBV}$  increase is approximately 1.35 times

389 larger for GE (mean  $\% \Delta \text{CBV} = 10.1$ , 95% CI = [8.1, 12.2]), compared to SE (mean  $\% \Delta \text{CBV} =$   
390 7.4, 95% CI = [6.5, 8.2]). We did not observe a difference in  $\Delta \text{CBV}$  across cortical depth  
391 ( $F_{(1,15.5)} = 0.23$ ,  $p = .637$ ). Thus, even though the different hypercapnia levels led to a gradual  
392 increase in CBV, this relative increase was approximately uniform across cortical depth.

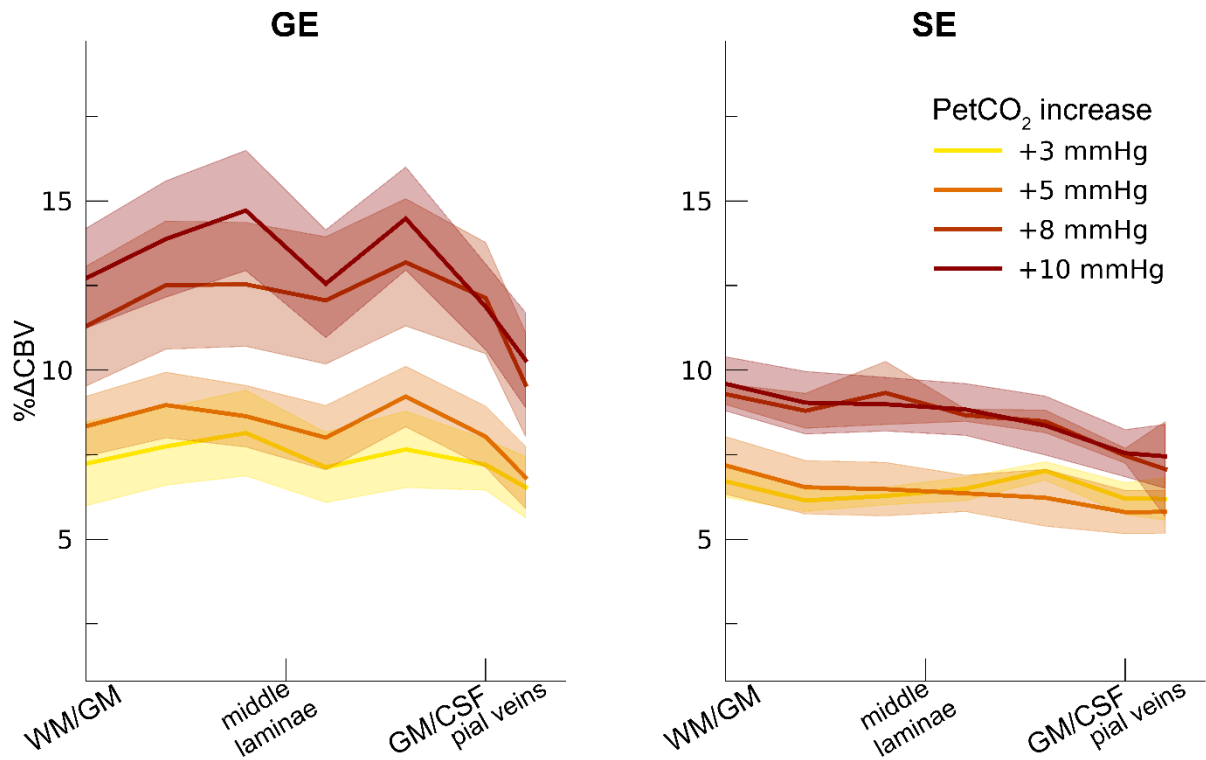

393

394 **Figure 8.  $\Delta \text{CBV}$ .** The  $\Delta \text{CBV}$  in percentages is shown across cortical depth for the 4 hypercapnia levels (colors)  
395 and 2 scan sequences (left/right panels). The shaded area represents the SEM across participants.

396

## 397 **Discussion**

### 398 *General discussion*

399 In the current study, we quantify the different effects that macro- and micro-vascular  
400 organization have on laminar fMRI BOLD signal. We find that increasing levels of  
401 hypercapnia result in increasing percent signal changes for both the macro- and micro-  
402 vasculature. However, the effect of hypercapnia on the BOLD signal is strongly dependent  
403 on cortical depth, as well as the different vascular compartments from which the signal  
404 originates. This effect is signified by the increasing CVR across cortical depth as sampled  
405 from the macro-vasculature. CVR estimates from the micro-vasculature do not show much  
406 difference in vessel dilation capacity across cortical depth. The hyperoxia condition also  
407 leads to an increase in percent signal change, which together with the PetO<sub>2</sub> trace allows for  
408 an estimation of the maximum theoretical BOLD signal: M-scaling. We find that M-scaling  
409 values increase strongly from deeper to more superficial layers. This trend was observed for  
410 both the micro- and macro-vasculature, albeit that the trend is significantly steeper for the  
411 macro-vasculature. Finally, we observed that increased levels of hypercapnia lead to an  
412 increase in  $\Delta$ CBV, which is significantly more pronounced in the macro- versus the micro-  
413 vasculature. We did not observe that the relative change in CBV differs across cortical depth.

### 414 *Hyperoxia and the theoretical maximal BOLD signal change*

415 We observe a mean increase in percent BOLD signal change following the hyperoxia  
416 condition of +350 mmHg PetO<sub>2</sub> increase, in line with previous hyperoxia reports<sup>40,47–50</sup>. The  
417 increase in PetO<sub>2</sub> presented here, equates to an air mixture consisting of roughly 60% O<sub>2</sub>,  
418 which is considered mild hyperoxia. It has previously been reported that mild cases of  
419 hyperoxia have a negligible effect on CBF<sup>47,50,51</sup>. This assumption allows for the estimation of  
420 the theoretical maximal percent signal change (M-scaling) per voxel on the basis of the  
421 hyperoxia BOLD signal change and the measured PetO<sub>2</sub> values. We find that both the  
422 macro-vasculature as well as the micro-vasculature are capable of generating a large BOLD  
423 signal change, purely on the basis of a relative venous oxyhemoglobin increase. Additionally,  
424 we find that the theoretical maximal BOLD signal change is lower at the deeper compared to  
425 the superficial cortical layers, ranging from 9 – 21 for the macro-vasculature and 9 – 16 for  
426 the micro-vasculature in line with previous high-field M estimations<sup>15,45,52</sup>. The M-scaling  
427 increase with cortical depth is logically reconcilable with the GE scan sequence, since GE  
428 scans are disproportionately sensitive to larger veins near the pial surface, increasing the  
429 maximum signal intensity. However, the increase in M-scaling across cortical depth was also  
430 seen for the SE scan sequence, albeit with a smaller slope. This either means that the

431 venous oxyhemoglobin increase differs across cortical depth independent from vascular  
432 compartment size, or that our SE scan sequence was unintentionally sensitive to vascular  
433 compartments larger than the capillary bed only.

#### 434 *Cerebrovascular reactivity (CVR)*

435 CVR is commonly used to describe vessel dilation properties<sup>17</sup>. Here we show that the  
436 macro-vasculature as measured by the GE scan sequence has a greater capacity for vessel  
437 dilation than the micro-vasculature as measured by the SE scan sequence. As the largest of  
438 the veins reside near the pial surface, we see that CVR increases for the macro-vasculature  
439 from deeper towards superficial cortical layers. This effect was not observed for the micro-  
440 vasculature. These findings indicate that capillaries and possibly smaller venules have a  
441 smaller capacity for dilation. Where similar CVR dilation properties for micro- and macro-  
442 vessels are observed for deeper cortical laminae, the macro-vasculature shows on average  
443 three times as much capacity for dilation than the micro-vasculature. Since CVR is often  
444 interpreted as a proxy for vessel health, high-spatial resolution vessel health measurements  
445 based on CVR should correct for the different dilation properties of differently sized vascular  
446 compartments across cortical depth. Additionally, the current findings implicate that neural  
447 signals as conveyed by the neurovascular coupling from smaller vascular compartments are  
448 limited by the maximum dilation capacity of capillaries<sup>26</sup>. The M-scaling parameter, however,  
449 indicates that the micro-vasculature is capable of generating a BOLD signal change  
450 comparable to the macro-vasculature. The fact that large BOLD signals from smaller  
451 vascular compartments are not frequently observed<sup>11,53</sup>, likely stems from the inability of the  
452 smallest vessels to dilate in a similar fashion as larger vessels.

#### 453 *Cerebral Blood Volume (CBV)*

454 Through the measurements of BOLD signal change during hypercapnia levels, the PetCO<sub>2</sub>  
455 trace, and the estimation of the M-scaling parameter, we have been able to estimate the  
456 relative change in CBV. A clear increase in CBV is seen for increasing levels of inspired CO<sub>2</sub>,  
457 which causes vessels to dilate. A relative increase of 12.5% CBV is seen during the highest  
458 hypercapnia level (i.e., +10 mmHg PetCO<sub>2</sub>) for the macro-vasculature. The same  
459 hypercapnia level as measured from the micro-vasculature causes on average 8.5% CBV  
460 change. Contrary to the other metrics of the current study, we find no significant difference in  
461 the CBV change across cortical depth. However, a small dip in  $\Delta$ CBV around the middle  
462 cortical layers can be observed (Figure 5), which has previously been observed with direct  
463  $\Delta$ CBV measurements, albeit with different experiment conditions<sup>54,55</sup>. Possibly, the absence  
464 of clear CBV changes across cortical depth is indicative of a conservation of matter (i.e.,

465 blood volume in this case): “what goes in, must come out”. This means that in all cortical  
466 layers a comparable relative CBV increase can be expected in early visual cortex following  
467 vasoactive stimuli, albeit that the absolute change in CBV likely scales with vessel diameter.

#### 468 *Limitations*

469 There are several limitations to this study that need to be mentioned. First, we have not been  
470 able to obtain all four hypercapnia levels (i.e., +3 mmHg, +5 mmHg, +8 mmHg, and +10  
471 mmHg PetCO<sub>2</sub>) for all participants. All participants have engaged in the +5 mmHg and +10  
472 mmHg PetCO<sub>2</sub> breathing challenges, meaning that current results of CVR and  $\Delta$ CBV may be  
473 skewed towards these conditions. However, missing values were dealt with by employing  
474 LMMs for statistical modeling, thereby including all available observations of the petCO<sub>2</sub> and  
475 estimating random slopes per participant. A second limitation concerns the spatial resolution  
476 of the SE scan sequence, which entailed a 1.5 mm isotropic voxel size. This spatial  
477 resolution was selected to attain a sufficiently large SNR, but simultaneously increases  
478 partial voluming effects that can result in a blurring of cortical laminae and the inclusion of  
479 white matter and CSF signals. The last limitation hinges on the assumptions made to  
480 estimate the M-scaling parameter and subsequent  $\Delta$ CBV values. Several of the assumed  
481 literature standard values are rarely debated (e.g., the O<sub>2</sub>-carrying capacity of hemoglobin,  
482 the concentration of hemoglobin in blood, and the solubility coefficient of oxygen in blood).  
483 However, standard values for the *OEF*, change in *CMRO*<sub>2</sub> during hypercapnia, transverse  
484 relaxation parameter  $\beta$ , and CBF/CBV coupling constant  $\alpha$  are less well agreed upon.  
485 Current M-scaling and  $\Delta$ CBV results are likely dependent on the assumed parameter values.

#### 486 *Conclusions*

487 Laminar BOLD fMRI is affected by vascularization differences that exist across cortical  
488 depth. In the current study, we reveal that macro- and micro-vascular compartments are  
489 capable of generating comparable percent BOLD signal changes across cortical depth.  
490 However, the macro-vascular compartments show a threefold capacity for dilation in the  
491 superficial cortical layers compared to the micro-vascular compartments. Additionally, the  
492 relative change in CBV is 1.35 times larger for the macro- versus micro-vasculature. This  
493 finding was unaffected by cortical depth, indicating that the change in CBV is not relatively  
494 larger for pail draining veins compared to smaller vessels in early visual cortex.

495

496 **Declarations**

497 *Funding*

498 This work was supported by the National Institute Of Mental Health of the  
499 National Institutes of Health under Award Number R01MH111417. The content is solely the  
500 responsibility of the authors and does not necessarily represent the official views of the  
501 National Institutes of Health.

502

503 *Conflicts of interest*

504 There are no conflicts of interest.

505 *Ethics approval*

506 This study was approved by the local medical ethics committee.

507 *Consent to participate*

508 All participants gave written informed consent prior to inclusion.

509 *Availability of data, material and code*

510 All data will be accessible through Flywheel.

511 *Authors' contribution*

512 Conceptualization: WS, AB, MB, JS, NP

513 Data acquisition: WS, AB, NP

514 Analysis: WS, AB, ER

515 Writing: WS

516

## 517 **References**

- 518 1 Palomero-Gallagher N, Zilles K. Cortical layers: Cyto-, myelo-, receptor- and synaptic  
519 architecture in human cortical areas. *Neuroimage* 2019; **197**: 716–741.
- 520 2 Adesnik H, Naka A. Cracking the Function of Layers in the Sensory Cortex. *Neuron*  
521 2018; **100**: 1028–1043.
- 522 3 Ogawa S, Lee TM, Kay AR, Tank DW. Brain magnetic resonance imaging with  
523 contrast dependent on blood oxygenation. *Proc Natl Acad Sci U S A* 1990; **87**: 9868–  
524 9872.
- 525 4 Gauthier CJ, Fan AP. BOLD signal physiology: Models and applications. *Neuroimage*  
526 2018; : 1–12.
- 527 5 Villringer A, Dirnagl U. Coupling of brain activity and cerebral blood flow: basis of  
528 functional neuroimaging. *Cerebrovasc Brain Metab Rev* 1995; **7**: 240–276.
- 529 6 Goense JBM, Logothetis NK. Neurophysiology of the BOLD fMRI signal in awake  
530 monkeys. *Curr Biol* 2008; **18**: 631–40.
- 531 7 Logothetis NK, Pauls J, Augath M, Trinath T, Oeltermann A. Neurophysiological  
532 investigation of the basis of the fMRI signal. *Nature* 2001; **412**: 150–157.
- 533 8 Duvernoy HM, Delon S, Vannson JL. Cortical blood vessels of the human brain. *Brain*  
534 *Res Bull* 1981; **7**: 519–579.
- 535 9 Goense J, Bohraus Y, Logothetis NK. fMRI at high spatial resolution implications for  
536 BOLD-models. *Front Comput Neurosci* 2016; **10**: 1–13.
- 537 10 Siero JCW, Petridou N, Hoogduin H, Luijten PR, Ramsey NF. Cortical depth-  
538 dependent temporal dynamics of the BOLD response in the human brain. *J Cereb*  
539 *Blood Flow Metab* 2011; **31**: 1999–2008.
- 540 11 Siero JCW, Ramsey NF, Hoogduin H, Klomp DWJ, Luijten PR, Petridou N. BOLD  
541 Specificity and Dynamics Evaluated in Humans at 7 T: Comparing Gradient-Echo and  
542 Spin-Echo Hemodynamic Responses. *PLoS One* 2013; **8**: 1–8.
- 543 12 Turner R. How much codex can a vein drain? Downstream dilution of activation-  
544 related cerebral blood oxygenation changes. *Neuroimage* 2002; **16**: 1062–1067.
- 545 13 Petridou N, Italiaander M, van de Bank BL, Siero JCW, Luijten PR, Klomp DWJ.  
546 Pushing the limits of high-resolution functional MRI using a simple high-density multi-  
547 element coil design. *NMR Biomed* 2013; **26**: 65–73.
- 548 14 Bhogal AA, Philippens MEP, Siero JCW, Fisher JA, Thade E, Luijten PR *et al.*  
549 *NeuroImage* Examining the regional and cerebral depth-dependent BOLD



- 550 cerebrovascular reactivity response at 7 T. *Neuroimage* 2015; **114**: 239–248.
- 551 15 Guidi M, Huber L, Lampe L, Gauthier CJ, Möller HE. Lamina-dependent calibrated  
552 BOLD response in human primary motor cortex. *Neuroimage* 2016; **141**: 250–261.
- 553 16 Hoge RD. Calibrated fMRI. *Neuroimage* 2012; **62**: 930–937.
- 554 17 Chen JJ, Gauthier CJ. The Role of Cerebrovascular-Reactivity Mapping in Functional  
555 MRI: Calibrated fMRI and Resting-State fMRI. *Front Physiol* 2021; **12**.  
556 doi:10.3389/fphys.2021.657362.
- 557 18 Poubanc J, Crawley AP, Sobczyk O, Montandon G, Sam K, Mandell DM *et al*.  
558 Measuring cerebrovascular reactivity: The dynamic response to a step hypercapnic  
559 stimulus. *J Cereb Blood Flow Metab* 2015; **35**: 1746–1756.
- 560 19 Bhogal AA, Siero JCW, Fisher JA, Froeling M, Luijten P, Philippens M *et al*.  
561 Investigating the non-linearity of the BOLD cerebrovascular reactivity response to  
562 targeted hypo/hypercapnia at 7T. *Neuroimage* 2014; **98**: 296–305.
- 563 20 Davis TL, Kwong KK, Weisskoff RM, Rosen BR. Calibrated functional MRI: Mapping  
564 the dynamics of oxidative metabolism. *Proc Natl Acad Sci U S A* 1998; **95**: 1834–  
565 1839.
- 566 21 Hoge RD, Atkinson J, Gill B, Crelier GR, Marrett S, Pike GB. Investigation of BOLD  
567 signal dependence on CBF and CMRO<sub>2</sub>: The deoxyhemoglobin dilution model.  
568 *Neuroimage* 1999; **9**: 849–863.
- 569 22 Chen JJ, Pike GB. MRI measurement of the BOLD-specific flow-volume relationship  
570 during hypercapnia and hypocapnia in humans. *Neuroimage* 2010; **53**: 383–391.
- 571 23 Markuerkiaga I, Barth M, Norris DG. A cortical vascular model for examining the  
572 specificity of the laminar BOLD signal. *Neuroimage* 2016; **132**: 491–498.
- 573 24 Uludağ K, Müller-Bierl B, Uğurbil K. An integrative model for neuronal activity-induced  
574 signal changes for gradient and spin echo functional imaging. *Neuroimage* 2009; **48**:  
575 150–165.
- 576 25 Zhao F, Wang P, Kim SG. Cortical Depth-Dependent Gradient-Echo and Spin-Echo  
577 BOLD fMRI at 9.4T. *Magn Reson Med* 2004; **51**: 518–524.
- 578 26 Tian P, Teng IC, May LD, Kurz R, Lu K, Scadeng M *et al*. Cortical depth-specific  
579 microvascular dilation underlies laminar differences in blood oxygenation level-  
580 dependent functional MRI signal. *Proc Natl Acad Sci U S A* 2010; **107**: 15246–15251.
- 581 27 Birn RM, Smith MA, Jones TB, Bandettini PA. The respiration response function: The  
582 temporal dynamics of fMRI signal fluctuations related to changes in respiration.



- 583            *Neuroimage* 2008; **40**: 644–654.
- 584    28    Van de Moortele P-F, Auerbach EJ, Olman C, Yacoub E, Ugurbil K, Moeller S. T1  
585            weighted brain images at 7 Tesla unbiased for proton density, T2\* contrast and RF coil  
586            receive B1 sensitivity with simultaneous vessel visualization. *Neuroimage* 2009; **46**:  
587            432–446.
- 588    29    Huber L (Renzo) R, Poser BA, Bandettini PA, Arora K, Wagstyl K, Cho S *et al.* LayNii:  
589            A software suite for layer-fMRI. *Neuroimage* 2021; **237**: 118091.
- 590    30    Bernier M, Cunnane SC, Whittingstall K. The morphology of the human  
591            cerebrovascular system. *Hum Brain Mapp* 2018; **39**: 4962–4975.
- 592    31    Huntenburg JM, Steele CJ, Bazin PL. Nighres: processing tools for high-resolution  
593            neuroimaging. *Gigascience* 2018; **7**: 1–9.
- 594    32    Schweser F, Deistung A, Lehr BW, Reichenbach JR. Quantitative imaging of intrinsic  
595            magnetic tissue properties using MRI signal phase: An approach to in vivo brain iron  
596            metabolism? *Neuroimage* 2011; **54**: 2789–2807.
- 597    33    Sun H, Wilman AH. Background field removal using spherical mean value filtering and  
598            Tikhonov regularization. *Magn Reson Med* 2014; **71**: 1151–1157.
- 599    34    Kames C, Wiggermann V, Rauscher A. Rapid two-step dipole inversion for  
600            susceptibility mapping with sparsity priors. *Neuroimage* 2018; **167**: 276–283.
- 601    35    Weber B, Keller AL, Reichold J, Logothetis NK. The microvascular system of the  
602            striate and extrastriate visual cortex of the macaque. *Cereb Cortex* 2008; **18**: 2318–  
603            2330.
- 604    36    Benson NC, Winawer J. Bayesian analysis of retinotopic maps. *Elife* 2018; **7**: 1–29.
- 605    37    Cox J.S. RW. H. AFNI: Software for analysis and visualization of functional magnetic  
606            resonance neuroimages. *Comput Biomed Res* 1996; **29**: 162–173.
- 607    38    Cox RW, Hyde JS. Software tools for analysis and visualization of fMRI data. *NMR*  
608            *Biomed* 1997; **10**: 171–178.
- 609    39    Avants BB, Tustison NJ, Song G, Cook PA, Klein A, Gee JC. A reproducible  
610            evaluation of ANTs similarity metric performance in brain image registration.  
611            *Neuroimage* 2011; **54**: 2033–2044.
- 612    40    Chiarelli PA, Bulte DP, Wise R, Gallichan D, Jezzard P. A calibration method for  
613            quantitative BOLD fMRI based on hyperoxia. *Neuroimage* 2007; **37**: 808–820.
- 614    41    Chen JJ, Pike GB. BOLD-specific cerebral blood volume and blood flow changes  
615            during neuronal activation in humans. *NMR Biomed* 2009; **22**: 1054–1062.

- 616 42 Severinghaus JW. Simple, accurate equations for human blood O<sub>2</sub> dissociation  
617 computations. *J Appl Physiol Respir Environ Exerc Physiol* 1979; **46**: 599–602.
- 618 43 Gauthier CJ, Hoge RD. Magnetic resonance imaging of resting OEF and CMRO<sub>2</sub>  
619 using a generalized calibration model for hypercapnia and hyperoxia. *Neuroimage*  
620 2012; **60**: 1212–1225.
- 621 44 Martindale J, Kennerley AJ, Johnston D, Zheng Y, Mayhew JE. Theory and  
622 generalization of Monte Carlo models of the BOLD signal source. *Magn Reson Med*  
623 2008; **59**: 607–618.
- 624 45 Kida I, Kennan RP, Rothman DL, Behar KL, Hyder F. High-resolution CMR(O<sub>2</sub>)  
625 mapping in rat cortex: A multiparametric approach to calibration of BOLD image  
626 contrast at 7 Tesla. *J Cereb Blood Flow Metab* 2000; **20**: 847–860.
- 627 46 Zappe AC, Uludağ K, Oeltermann A, Uğurbil K, Logothetis NK. The influence of  
628 moderate hypercapnia on neural activity in the anesthetized nonhuman primate. *Cereb*  
629 *Cortex* 2008; **18**: 2666–2673.
- 630 47 Wise RG, Harris AD, Stone AJ, Murphy K. Measurement of OEF and absolute  
631 CMRO<sub>2</sub>: MRI-based methods using interleaved and combined hypercapnia and  
632 hyperoxia. *Neuroimage* 2013; **83**: 135–147.
- 633 48 MacDonald ME, Berman AJL, Mazerolle EL, Williams RJ, Pike GB. Modeling  
634 hyperoxia-induced BOLD signal dynamics to estimate cerebral blood flow, volume and  
635 mean transit time. *Neuroimage* 2018; **178**: 461–474.
- 636 49 Ma Y, Berman AJL, Pike GB. The effect of dissolved oxygen on the relaxation rates of  
637 blood plasma: Implications for hyperoxia calibrated BOLD. *Magn Reson Med* 2016;  
638 **76**: 1905–1911.
- 639 50 Gauthier CJ, Hoge RD. A generalized procedure for calibrated MRI incorporating  
640 hyperoxia and hypercapnia. *Hum Brain Mapp* 2013; **34**: 1053–1069.
- 641 51 Ascher AS, Burns GP, Lubner JM, Fox D, Wise L. Effect of increasing inspired oxygen  
642 concentration on hemodynamics and regional blood flows. *Crit Care Med* 1988; **16**:  
643 1235–1237.
- 644 52 Shu CY, Herman P, Coman D, Sanganahalli BG, Wang H, Juchem C *et al*. Brain  
645 region and activity-dependent properties of M for calibrated fMRI. *Neuroimage* 2016;  
646 **125**: 848–856.
- 647 53 Gati JS, Menon RS, Uğurbil K, Rutt BK. Experimental determination of the BOLD field  
648 strength dependence in vessels and tissue. *Magn Reson Med* 1997; **38**: 296–302.
- 649 54 Huber L, Handwerker DA, Jangraw DC, Chen G, Hall A, Stüber C *et al*. High-

650 Resolution CBV-fMRI Allows Mapping of Laminar Activity and Connectivity of Cortical  
651 Input and Output in Human M1. *Neuron* 2017; **96**: 1253-1263.e7.

652 55 Huber L, Uludağ K, Möller HE. Non-BOLD contrast for laminar fMRI in humans: CBF,  
653 CBV, and CMRO2. *Neuroimage* 2019; **197**: 742–760.

654
